# Supplementary material for: The IMPROVEDD VTE Risk Score: Incorporation of D-Dimer into the IMPROVE Score to Improve Venous Thromboembolism Risk Stratification
Source: PubMed Central journal article supplement — TH Open. 2017 Jun 28;1(1):e56–65. doi: 10.1055/s-0037-1603929 (PMC6524839; doi:10.1055/s-0037-1603929), 2017-06-28
Supplement: 10-1055-s-0037-1603929-s17006.pdf [file 10-1055-s-0037-1603929-s17006.pdf]

**Table S1** Multivariable regression analysis of VTE risk factors considering thromboprophylaxis<sup>a</sup>

| Variable                     | Comparison                               | HR (95% CI)      | p-Value    |
|------------------------------|------------------------------------------|------------------|------------|
| <b>At 42 d</b>               |                                          |                  |            |
| Thromboprophylaxis           | Enoxaparin vs. betrixaban                | 1.67 (1.07–2.62) | 0.0239     |
| D-dimer                      | $\geq 2 \times$ ULN vs. $< 2 \times$ ULN | 2.30 (1.36–3.89) | 0.0018     |
| IMPROVE VTE risk factor      |                                          |                  |            |
| Previous VTE                 | Yes vs. no                               | 2.20 (1.16–4.17) | 0.0154     |
| Known thrombophilia          | Yes vs. no                               | –                | –          |
| Current lower-limb paralysis | Yes vs. no                               | 0.67 (0.24–1.82) | 0.43       |
| Current cancer               | Yes vs. no                               | 0.64 (0.16–2.61) | 0.54       |
| Immobilization               | $\geq 7$ vs. $< 7$ d                     | –                | –          |
| ICU or CCU stay              | Yes vs. no                               | 2.94 (1.74–4.97) | $< 0.0001$ |
| Age                          | $> 60$ vs. $\leq 60$ y                   | 0.98 (0.37–2.60) | 0.97       |
| <b>At 77 d</b>               |                                          |                  |            |
| Thromboprophylaxis           | Enoxaparin vs. betrixaban                | 1.99 (1.31–3.03) | 0.0013     |
| D-dimer                      | $\geq 2 \times$ ULN vs. $< 2 \times$ ULN | 2.26 (1.40–3.63) | 0.0008     |
| IMPROVE VTE risk factor      |                                          |                  |            |
| Previous VTE                 | Yes vs. no                               | 2.21 (1.23–3.97) | 0.0083     |
| Known thrombophilia          | Yes vs. no                               | –                | –          |
| Current lower-limb paralysis | Yes vs. no                               | 1.03 (0.48–2.22) | 0.94       |
| Current cancer               | Yes vs. no                               | 0.84 (0.27–2.65) | 0.76       |
| Immobilization               | $\geq 7$ vs. $< 7$ d                     | –                | –          |
| ICU or CCU stay              | Yes vs. no                               | 2.98 (1.84–4.84) | $< 0.0001$ |
| Age                          | $> 60$ vs. $\leq 60$ y                   | 1.19 (0.45–3.11) | 0.73       |

Abbreviations: CCU, coronary care unit; HR, hazard ratio; ICU, intensive care unit; ULN, upper limit of normal; VTE, venous thromboembolism.

<sup>a</sup>A total of 206 subjects with incomplete covariate information were dropped from the model.

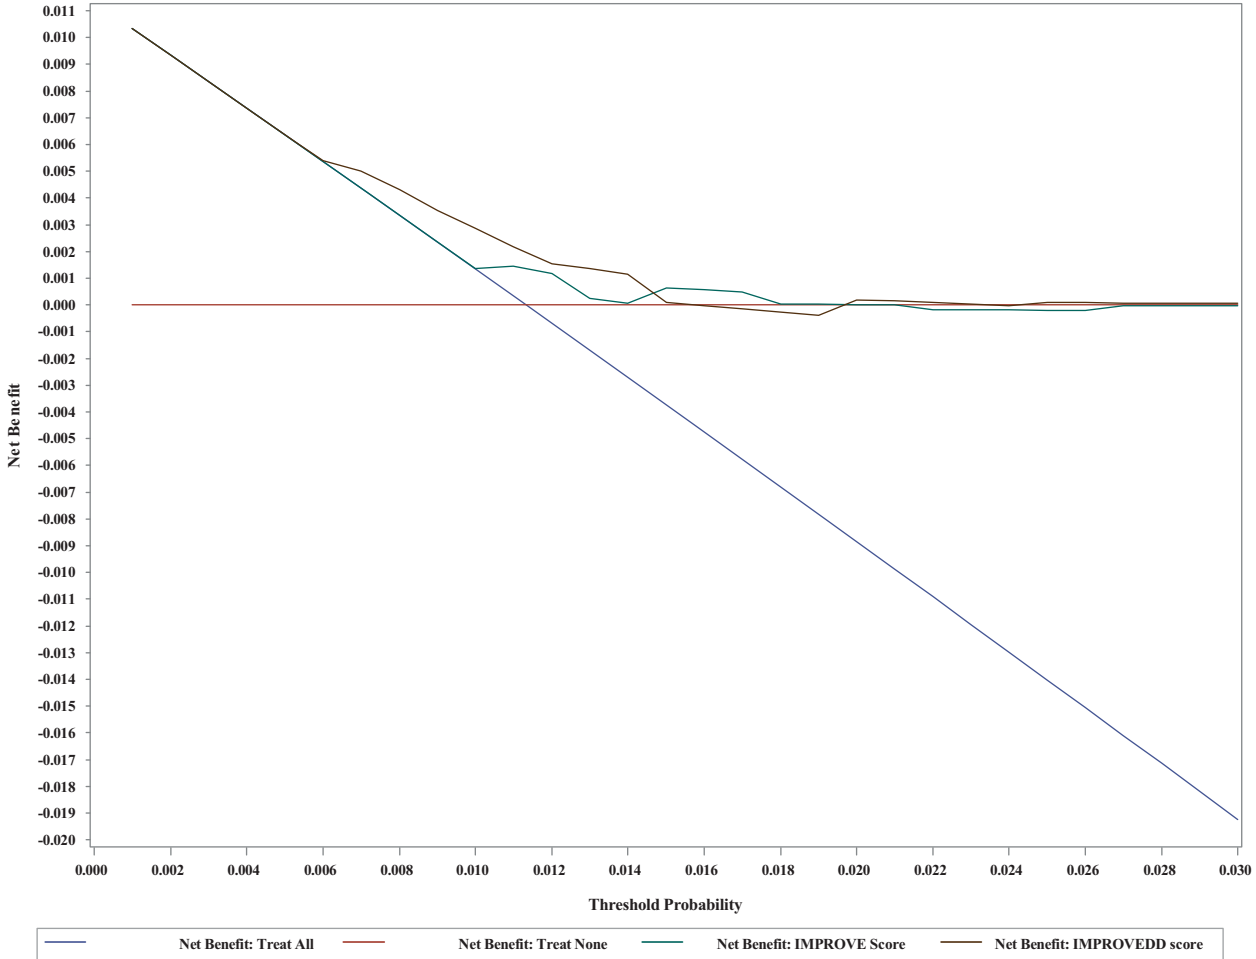

Fig. S1 Decision curves comparing the net benefit of the IMPROVE and IMPROVEDD score in predicting VTE at 42 days.

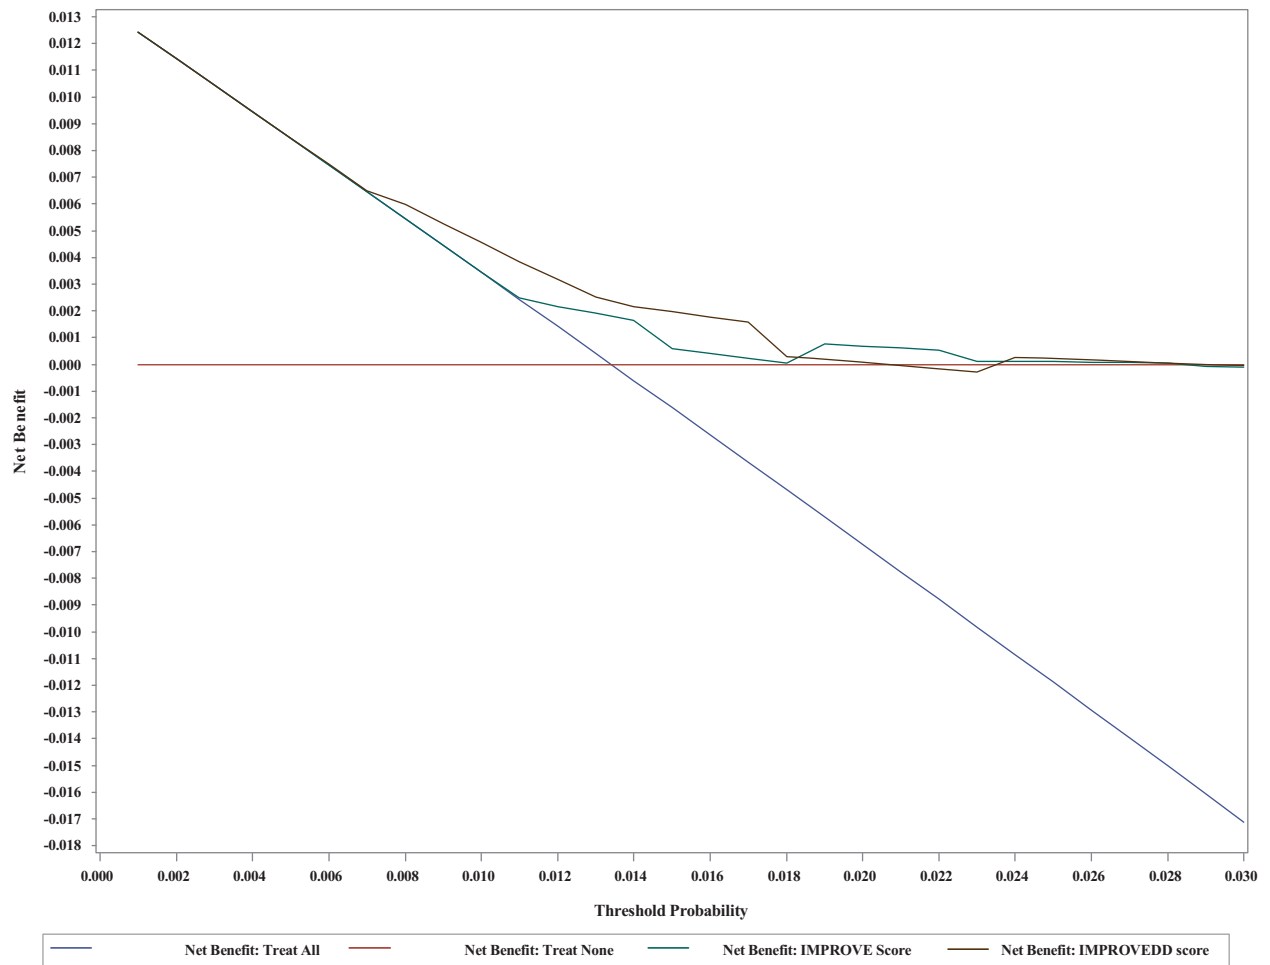

**Fig. S2** Decision curves comparing the net benefit of the IMPROVE and IMPROVEDD score in predicting VTE at 77 days.
